# Supplementary material for: A Repertoire of the Less Common Clinical Yeasts
Source: MDPI journal article supplement (doi:10.3390/jof9111099), 2023-11-11
Supplement: s1 [file s1]

**Table S1.** Number of publications found by anatomical site and species for Ascomycota division. Several anatomical sites of isolation could be found in the same publication (PMID).

| Name                            | Current name                    | Year of first publication | Year of last publication | Systemic | CNS | Eye | Ear | Dental and gums | ORL system | Lung | Breast | Heart | Gut | Liver | Urinary tract | Genitalia | Osteo-articular | Skeletal muscles | Soft tissue | Skin | Endocrine glands | Placenta | Total |
|---------------------------------|---------------------------------|---------------------------|--------------------------|----------|-----|-----|-----|-----------------|------------|------|--------|-------|-----|-------|---------------|-----------|-----------------|------------------|-------------|------|------------------|----------|-------|
| <i>Candida</i> spp.             |                                 |                           |                          | 669      | 35  | 50  | 33  | 16              | 279        | 166  |        | 31    | 131 | 16    | 183           | 110       | 44              | 1                | 4           | 183  |                  | 3        | 1954  |
| <i>Candida allociferii</i>      | <i>Blastobotrys allociferii</i> | 2015                      | 2015                     |          |     | 1   |     |                 |            |      |        |       |     |       |               |           |                 |                  |             |      |                  |          | 1     |
| <i>Candida auris</i>            | Under reclassification          | 2009                      | 2020                     | 86       | 7   | 6   | 21  |                 | 22         | 31   |        | 1     | 25  |       | 48            | 2         | 14              |                  | 1           | 46   |                  |          | 310   |
| <i>Candida blankii</i>          | Under reclassification          | 2018                      | 2020                     | 3        |     |     |     |                 |            |      |        |       |     |       |               |           |                 |                  |             |      |                  |          | 3     |
| <i>Candida bracarensis</i>      | <i>Nakaseomyces bracarensis</i> | 2009                      | 2019                     | 2        |     |     |     |                 |            | 1    |        |       | 1   |       |               | 2         |                 |                  |             |      |                  |          | 6     |
| <i>Candida colliculosa</i>      | <i>Torulaspora delbrueckii</i>  | 2003                      | 2016                     |          |     |     |     |                 |            |      |        | 1     |     |       |               | 1         |                 |                  |             | 1    |                  |          | 3     |
| <i>Candida globata</i>          |                                 | 2017                      | 2017                     | 1        |     |     |     |                 |            |      |        |       |     |       |               |           |                 |                  |             |      |                  |          | 1     |
| <i>Candida diddensiae</i>       |                                 | 2020                      | 2020                     | 1        |     |     |     |                 |            |      |        |       |     |       |               |           |                 |                  |             |      |                  |          | 1     |
| <i>Candida dubliniensis</i>     | Under reclassification          | 1995                      | 2020                     | 60       | 8   | 7   |     | 10              | 130        | 35   |        | 5     | 11  | 4     | 20            | 28        | 4               |                  |             | 9    |                  |          | 331   |
| <i>Candida duobushaemulonii</i> |                                 | 2012                      | 2019                     | 4        |     |     |     |                 |            | 1    |        |       |     |       |               | 1         | 1               |                  | 1           | 5    |                  |          | 13    |
| <i>Candida ernobii</i>          | <i>Nakazawaea ernobii</i>       | 2013                      | 2014                     | 1        |     |     |     |                 |            |      |        |       |     |       |               |           |                 |                  |             |      |                  |          | 1     |
| <i>Candida etchellsii</i>       |                                 | 2014                      | 2014                     |          |     |     |     |                 |            |      |        |       |     |       |               |           |                 |                  |             | 1    |                  |          | 1     |
| <i>Candida galli</i>            | <i>Yarrowia galli</i>           | 2014                      | 2020                     |          |     |     |     |                 |            |      |        |       |     |       |               |           |                 |                  |             | 3    |                  |          | 3     |
| <i>Candida haemulonii</i>       |                                 | 1991                      | 2020                     | 14       |     |     |     |                 |            |      |        |       | 2   |       | 1             | 1         | 3               |                  | 2           | 7    |                  |          | 30    |
| <i>Candida humicola</i>         | <i>Vanrija humicola</i>         | 1971                      | 1998                     |          | 1   | 2   |     |                 |            |      |        |       | 1   |       | 1             |           |                 |                  |             | 1    |                  |          | 6     |

|                                  |                                   |      |      |      |   |   |   |   |   |   |   |   |    |   |    |      |
|----------------------------------|-----------------------------------|------|------|------|---|---|---|---|---|---|---|---|----|---|----|------|
| <i>Candida inconspicua</i>       | Under reclassification            | 1997 | 2019 | 6    |   |   | 2 | 7 |   | 2 | 1 | 1 | 6  |   | 3  | 28   |
| <i>Torulopsis inconspicua</i>    | <i>Candida inconspicua</i>        | 1973 | 1999 | 1    |   |   |   |   |   |   |   |   | 1  |   |    | 2    |
| <i>Candida intermedia</i>        |                                   | 1954 | 2018 | 4    |   |   |   | 1 |   |   |   |   | 2  |   |    | 7    |
| <i>Candida magnoliae</i>         | <i>Starmerella magnoliae</i>      | 1995 | 2020 | 1    |   | 1 |   | 1 |   |   |   |   |    |   |    | 3    |
| <i>Candida membranaefaciens</i>  |                                   | 2011 | 2017 | 2(4) |   |   |   |   |   |   |   |   |    |   |    | 2(4) |
| <i>Candida membranifaciens</i>   | <i>Candida membranaefaciens</i>   | 2011 | 2017 | 2    |   |   |   |   |   |   |   |   |    |   |    | 2    |
| <i>Candida mengyuniae</i>        | <i>Cyberlindnera mengyuniae</i>   | 2011 | 2011 | 1    |   |   |   |   |   |   |   |   |    |   |    | 1    |
| <i>Candida mesorugosa</i>        | <i>Diutina mesorugosa</i>         | 2013 | 2019 | 2    |   |   |   |   |   | 1 |   | 1 |    |   | 1  | 5    |
| <i>Candida metapsilosis</i>      |                                   | 2005 | 2020 | 31   |   | 2 |   | 3 | 4 |   | 3 |   | 5  | 6 | 16 | 70   |
| <i>Candida mycoderma</i>         | <i>Candida vini</i>               | 1958 | 2016 |      |   | 1 |   |   | 3 |   | 1 | 1 | 1  | 1 |    | 8    |
| <i>Candida nivariensis</i>       | <i>Nakaseomyces nivariensis</i>   | 2005 | 2020 | 11   |   |   | 4 | 7 |   | 2 | 2 | 6 | 6  |   | 1  | 39   |
| <i>Candida orthopsilosis</i>     | Under reclassification            | 2005 | 2020 | 35   |   | 3 | 2 | 5 | 3 |   | 2 |   | 10 | 5 | 1  | 75   |
| <i>Candida palmiophila</i>       | Under reclassification            | 1999 | 2020 | 3    |   | 1 |   | 1 |   |   |   |   | 1  |   |    | 6    |
| <i>Candida pararugosa</i>        | <i>Diutina pararugosa</i>         | 2004 | 2019 | 3    |   |   |   | 2 |   |   |   |   |    |   | 1  | 6    |
| <i>Candida pintolopesii</i>      | <i>Kazachstania pintolopesii</i>  | 1987 | 1987 |      |   |   |   | 1 |   |   |   |   |    |   |    | 1    |
| <i>Candida pseudoaaseri</i>      |                                   | 2011 | 2011 | 1    |   |   |   |   |   |   |   |   |    |   |    | 1    |
| <i>Candida pseudohaemulonii</i>  | Under reclassification            | 2009 | 2012 | 4    |   |   |   |   |   |   |   |   | 1  |   |    | 5    |
| <i>Candida pseudohumilis</i>     | <i>Kazachstania pseudohumilis</i> | 2009 | 2009 |      |   |   |   | 1 |   |   |   |   |    |   |    | 1    |
| <i>Candida pseudorugosa</i>      | <i>Diutina pseudorugosa</i>       | 2012 | 2013 | 1    |   |   |   |   | 1 |   |   |   |    |   |    | 2    |
| <i>Candida quercitrusa</i>       | <i>Kurtzmaniella quercitrusa</i>  | 2014 | 2015 | 2    |   |   |   |   |   |   |   |   |    |   |    | 2    |
| <i>Candida rugosa</i>            | <i>Diutina rugosa</i>             | 1985 | 2019 | 19   | 1 |   |   | 3 | 4 |   | 3 |   | 2  | 1 | 1  | 37   |
| <i>Candida sake</i>              | Under reclassification            | 1998 | 2011 | 1    |   |   | 2 | 1 |   | 2 | 1 |   | 1  | 1 | 1  | 10   |
| <i>Candida spencermartinsiae</i> |                                   | 2018 | 2018 |      |   |   |   | 1 |   |   |   |   |    |   |    | 1    |
| <i>Candida sphaerica</i>         | <i>Kluyveromyces lactis</i>       | 2010 | 2014 | 1    |   |   |   | 1 |   |   |   |   |    |   |    | 2    |
| <i>Candida stellimalicola</i>    |                                   | 2018 | 2018 |      |   |   |   |   |   | 1 |   |   |    |   |    | 1    |
| <i>Candida tunisiensis</i>       | Under reclassification            | 2013 | 2013 |      |   |   |   | 1 |   |   |   |   |    |   |    | 1    |

|                                  |                               |      |      |           |      |     |     |     |           |           |     |           |     |           |      |      |     |           |     |            |
|----------------------------------|-------------------------------|------|------|-----------|------|-----|-----|-----|-----------|-----------|-----|-----------|-----|-----------|------|------|-----|-----------|-----|------------|
| <i>Candida viswanathii</i>       | Under reclassification        | 1976 | 2015 | 1         | 1    |     |     |     |           |           |     |           |     |           |      |      |     | 1         | 3   |            |
| <i>Candida wangnamkhiaoensis</i> |                               | 2016 | 2016 | 1         |      |     |     |     |           |           |     |           |     |           |      |      |     |           | 1   |            |
| <i>Candida zeylanoides</i>       | Under reclassification        | 1987 | 2019 | 3         |      |     |     |     |           |           | 1   | 1         |     | 2         | 1    |      |     | 2         | 10  |            |
| <i>Clavispora lusitaniae</i>     |                               | 1990 | 2020 | 7<br>(78) | 2(6) | (4) | (1) | (1) | 1<br>(18) | 2<br>(20) | (4) | 2<br>(22) | (3) | 2<br>(34) | (16) | (6)  |     | 2<br>(13) | (2) | (23<br>1)  |
| <i>Candida lusitaniae</i>        | <i>Clavispora lusitaniae</i>  | 1979 | 2020 | 74        | 4    | 4   | 1   | 1   | 17        | 18        | 4   | 20        | 3   | 32        | 16   | 6    |     | 11        | 2   | 213        |
| <i>Cyberlindnera fabianii</i>    |                               | 2016 | 2019 | 4<br>(11) |      |     | (1) |     | (2)       | (3)       | (1) | 1(3)      |     | (4)       | (1)  |      |     | (1)       |     | 5<br>(27)  |
| <i>Candida fabianii</i>          | <i>Cyberlindnera fabianii</i> | 2006 | 2016 | 4         |      |     | 1   |     | 1         | 1         |     | 1         |     | 2         | 1    |      |     | 1         |     | 12         |
| <i>Hansenula fabianii</i>        | <i>Cyberlindnera fabianii</i> | 1990 | 1990 |           |      |     |     |     |           |           |     |           |     | 1         |      |      |     |           |     | 1          |
| <i>Lindnera fabianii</i>         | <i>Cyberlindnera fabianii</i> | 2012 | 2014 | 3         |      |     |     |     | 1         |           |     | 1         |     | 1         |      |      |     |           |     | 6          |
| <i>Pichia fabianii</i>           | <i>Cyberlindnera fabianii</i> | 2006 | 2015 | 4         |      |     |     |     |           | 2         | 1   |           |     |           |      |      |     |           |     | 7          |
| <i>Cyberlindnera jadinii</i>     |                               | 2016 | 2019 | (6)       |      | (1) |     |     | (1)       |           |     |           |     | (1)       | 1(1) |      |     | 1(1)      |     | 2<br>(11)  |
| <i>Candida utilis</i>            | <i>Cyberlindnera jadinii</i>  | 1988 | 2018 | 6         |      | 1   |     |     |           |           |     |           |     | 1         |      |      |     | 1         |     | 9          |
| <i>Torula utilis</i>             | <i>Cyberlindnera jadinii</i>  | 1965 | 1965 |           |      |     |     |     |           | 1         |     |           |     |           |      |      |     |           |     | 1          |
| <i>Debaryomyces hansenii</i>     |                               | 1982 | 2017 | 1<br>(20) | (2)  | (4) | (1) | (1) | 1(8)      | 2(4)      | (1) | 3<br>(10) | (1) | 1(3)      | (6)  | 1(1) | (1) | 2<br>(11) |     | 11<br>(74) |
| <i>Debaryomyces kloeckeri</i>    | <i>Debaryomyces hansenii</i>  | 1960 | 1960 | 1         |      |     |     |     |           |           |     |           |     |           |      |      | 1   | 1         |     | 3          |
| <i>Candida famata</i>            | <i>Debaryomyces hansenii</i>  | 1986 | 2020 | 17        | 2    | 3   | 1   | 1   | 7         | 2         | 1   | 7         | 1   | 2         | 6    |      |     | 5         |     | 55         |
| <i>Torulopsis candida</i>        | <i>Debaryomyces hansenii</i>  | 1969 | 1991 | 1         |      | 1   |     |     |           |           |     |           |     |           |      |      |     | 3         |     | 5          |
| ( <i>Diutina catenulata</i> )    |                               | NA   | NA   | (2)       |      |     |     |     |           |           |     |           |     |           |      |      |     | (1)       |     | (3)        |
| <i>Candida catenulate</i>        | <i>Diutina catenulata</i>     | 1999 | 2018 | 2         |      |     |     |     |           |           |     |           |     |           |      |      |     |           |     | 2          |
| <i>Candida ravautii</i>          | <i>Diutina catenulata</i>     | 1977 | 1977 |           |      |     |     |     |           |           |     |           |     |           |      |      |     | 1         |     | 1          |
| ( <i>Kazachstania exigua</i> )   |                               | NA   | NA   |           |      |     |     |     |           |           |     |           |     |           | (1)  | (1)  |     |           |     | (2)        |
| <i>Candida holmii</i>            | <i>Kazachstania exigua</i>    | 2007 | 2007 |           |      |     |     |     |           |           |     |           |     |           | 1    |      |     |           |     | 1          |

|                                  |                                  |      |      |            |     |      |      |     |           |           |      |       |           |           |      |      |           |             |
|----------------------------------|----------------------------------|------|------|------------|-----|------|------|-----|-----------|-----------|------|-------|-----------|-----------|------|------|-----------|-------------|
| <i>Torulopsis holmii</i>         | <i>Kazachstania exigua</i>       | 1983 | 1983 |            |     |      |      |     |           |           |      |       |           |           |      | 1    | 1         |             |
| <i>Kluyveromyces marxianus</i>   |                                  | 2014 | 2020 | 2<br>(29)  | (1) | (1)  | (1)  |     | 2<br>(23) | 1(7)      | (1)  | (10)  | 1<br>(18) | (9)       |      | (3)  | (1)       | 6<br>(104)  |
| <i>Candida kefyr</i>             | <i>Kluyveromyces marxianus</i>   | 1992 | 2020 | 22         |     |      | 1    |     | 19        | 6         | 1    | 7     | 14        | 8         |      | 3    | 1         | 82          |
| <i>Candida pseudotropicalis</i>  | <i>Kluyveromyces marxianus</i>   | 1955 | 2014 | 5          | 1   | 1    |      |     | 2         |           |      | 3     | 3         | 1         |      |      |           | 16          |
| <i>Kodamaea ohmeri</i>           |                                  | 2004 | 2020 | 23<br>(31) |     | 1    |      |     | 4(5)      | 2         | 3(5) | 2(3)  | (1)       |           |      | 6(8) |           | 41<br>(56)  |
| <i>Pichia ohmeri</i>             | <i>Kodamaea ohmeri</i>           | 1998 | 2013 | 8          |     |      |      |     | 1         |           | 2    | 1     | 1         |           |      | 2    |           | 15          |
| <i>Metschnikowia pulcherrima</i> |                                  | 1972 | 1998 | 1(6)       |     |      |      |     |           | 1         |      |       | 1(2)      |           |      | (1)  |           | 3<br>(10)   |
| <i>Candida pulcherrima</i>       | <i>Metschnikowia pulcherrima</i> | 1972 | 2018 | 5          |     |      |      |     |           |           |      |       | 1         |           |      | 1    |           | 7           |
| <i>Meyerozyma caribbica</i>      |                                  | 2019 | 2019 | (8)        |     | (1)  |      |     | (2)       | 1(3)      |      | (2)   | (1)       |           | (1)  |      |           | 1(18)       |
| <i>Candida fermentati</i>        | <i>Meyerozyma caribbica</i>      | 2008 | 2018 | 8          |     | 1    |      |     | 1         | 2         |      | 2     | 1         |           | 1    |      |           | 16          |
| <i>Pichia caribbica</i>          | <i>Meyerozyma caribbica</i>      | 2013 | 2013 |            |     |      |      |     | 1         |           |      |       |           |           |      |      |           | 1           |
| <i>Meyerozyma guilliermondii</i> |                                  | 2011 | 2021 | 6<br>(66)  | (6) | (5)  | (2)  | (2) | (26)      | 2<br>(13) | (5)  | 1(14) | (3)       | 1<br>(13) | (11) | (4)  | 1<br>(22) | 11<br>(192) |
| <i>Candida guilliermondii</i>    | <i>Meyerozyma guilliermondii</i> | 1970 | 2020 | 58         | 6   | 5    | 2    | 2   | 25        | 9         | 5    | 12    | 3         | 11        | 11   | 4    | 21        | 174         |
| <i>Pichia guilliermondii</i>     | <i>Meyerozyma guilliermondii</i> | 2008 | 2016 | 2          |     |      |      |     | 1         | 2         |      | 1     |           | 1         |      |      |           | 7           |
| <i>Pichia norvegensis</i>        |                                  | 1976 | 1976 | (10)       |     |      |      | (1) | (5)       | (3)       | (1)  | (5)   | (1)       | (4)       | 1    |      | (1)       | 1<br>(32)   |
| <i>Candida norvegensis</i>       | <i>Pichia norvegensis</i>        | 1990 | 2018 | 10         |     |      |      | 1   | 5         | 3         | 1    | 5     | 1         | 4         |      |      | 1         | 31          |
| <i>Pichia fermentans</i>         |                                  | 2015 | 2015 | (4)        |     |      |      |     |           | 1         |      |       |           |           | (1)  |      |           | 1(6)        |
| <i>Candida lambica</i>           | <i>Pichia fermentans</i>         | 1995 | 2012 | 4          |     |      |      |     |           |           |      |       |           |           | 1    |      |           | 5           |
| <i>Stephanoascus ciferrii</i>    |                                  | 2010 | 2018 | (3)        |     | 1(2) | 1(2) |     |           | 1(2)      |      |       |           |           |      | (4)  |           | 3           |

|                                        |                                  |      |      |            |          |          |          |          |           |           |  |          |            |          |           |          |          |           |                  |
|----------------------------------------|----------------------------------|------|------|------------|----------|----------|----------|----------|-----------|-----------|--|----------|------------|----------|-----------|----------|----------|-----------|------------------|
|                                        |                                  |      |      |            |          |          |          |          |           |           |  |          |            |          |           |          |          |           |                  |
|                                        |                                  |      |      |            |          |          |          |          |           |           |  |          |            |          |           |          |          |           | (13)             |
| <i>Candida ciferrii</i>                | <i>Stephanoascus ciferrii</i>    | 1983 | 2017 | 3          |          | 1        | 1        |          | 1         |           |  |          |            |          |           | 4        |          |           | 10               |
| <i>Wickerhamomyces anomalus</i>        |                                  | 2012 | 2017 | 5<br>(56)  | (2)      | 2(6)     |          |          | 1(6)      | (3)       |  | (1)      | (4)        |          | (3)       |          | 1(2)     | (3)       | 9<br>(86)        |
| <i>Candida pelliculosa</i>             | <i>Wickerhamomyces anomalous</i> | 1991 | 2018 | 14         | 1        | 2        |          |          | 2         |           |  |          |            |          |           |          |          |           | 19               |
| <i>Hansenula anomala</i>               | <i>Wickerhamomyces anomalous</i> | 1958 | 2010 | 27         | 1        | 1        |          |          | 1         | 2         |  | 1        | 2          |          | 3         |          | 1        | 1         | 40               |
| <i>Pichia anomala</i>                  | <i>Wickerhamomyces anomalous</i> | 1999 | 2014 | 10         |          | 1        |          |          | 2         | 1         |  |          | 2          |          |           |          | 2        |           | 18               |
| <i>Yarrowia lipolytica</i>             |                                  | 1985 | 2020 | 11<br>(23) |          | 1(3)     |          |          | (5)       | 1(3)      |  | 1        | (1)        |          | (1)       | 1        |          | 1(3)      | 16<br>(41)       |
| <i>Candida lipolytica</i>              | <i>Yarrowia lipolytica</i>       | 1976 | 2017 | 12         |          | 2        |          |          | 5         | 2         |  |          | 1          |          |           | 1        |          | 2         | 25               |
| <i>Zygoascus hellenicus</i>            |                                  | 2004 | 2004 | 1          |          |          |          |          |           |           |  |          |            |          |           |          |          |           | 1                |
| <i>Candida hellenica</i>               | <i>Zygoascus hellenicus</i>      | 2004 | 2011 |            |          |          |          |          |           | 1         |  |          |            |          |           |          |          |           | 1                |
| <b>Magnusiomyces/Saprochaete clade</b> |                                  |      |      | <b>95</b>  | <b>4</b> | <b>7</b> | <b>2</b> | <b>4</b> | <b>25</b> | <b>48</b> |  | <b>6</b> | <b>39</b>  | <b>9</b> | <b>19</b> | <b>3</b> | <b>6</b> | <b>30</b> | <b>1</b>         |
|                                        |                                  |      |      |            |          |          |          |          |           |           |  |          |            |          |           |          |          |           |                  |
| <i>Geotrichum candidum</i>             |                                  | 1953 | 2019 | 11         | 1        | 4<br>(5) | 1        | 2        | 9         | 7         |  | 1        | 15<br>(16) | 1        | 3         | 2        | 1        | 15        | 73<br>(75)       |
| <i>Galactomyces geotrichum</i>         | <i>Geotrichum candidum</i>       | 2012 | 2017 |            |          | 1        |          |          |           |           |  |          | 1          |          |           |          |          |           | 2                |
| <i>Magnusiomyces capitatus</i>         |                                  | 2016 | 2019 | 4<br>(73)  | (3)      | 2        | (1)      | 1(2)     | 2<br>(15) | 4<br>(37) |  | (4)      | 3<br>(19)  | (6)      | 1<br>(16) | (1)      | (5)      | 2<br>(12) | (1)<br>(19<br>7) |
| <i>Blastoschizomyces capitatus</i>     | <i>Magnusiomyces capitatus</i>   | 1990 | 2018 | 5          | 1        |          |          |          | 1         | 4         |  | 1        | 1          | 1        | 1         |          | 1        | 1         | 17               |
| <i>Dipodascus capitatus</i>            | <i>Magnusiomyces capitatus</i>   | 2004 | 2017 | 5          | 1        |          |          |          | 1         | 3         |  |          |            |          | 1         |          | 1        |           | 12               |
| <i>Geotrichum capitatum</i>            | <i>Magnusiomyces capitatus</i>   | 1989 | 2020 | 28         | 1        |          |          |          | 4         | 14        |  |          | 4          | 2        | 6         | 1        | 1        | 3         | 64               |
| <i>Saprochaete capitata</i>            | <i>Magnusiomyces capitatus</i>   | 2011 | 2020 | 20         |          |          |          |          | 2         | 7         |  |          | 4          |          | 3         |          | 1        | 4         | 41               |

|                                                          |                                   |      |      |           |          |            |   |          |           |           |          |          |           |          |            |           |          |          |          |           |            |                |
|----------------------------------------------------------|-----------------------------------|------|------|-----------|----------|------------|---|----------|-----------|-----------|----------|----------|-----------|----------|------------|-----------|----------|----------|----------|-----------|------------|----------------|
| <i>Trichosporon capitatum</i>                            | <i>Magnusiomyces capitatus</i>    | 1965 | 2012 | 11        |          |            | 1 | 1        | 5         | 5         |          | 3        | 7         | 3        | 4          |           | 1        |          | 2        | 1         | 44         |                |
| ( <i>Magnusiomyces clavatus</i> )                        |                                   | NA   | NA   | (11)      |          |            |   |          | (1)       | (4)       |          | (1)      | (4)       | (2)      |            |           |          |          | (3)      |           | (26)       |                |
| <i>Geotrichum clavatum</i>                               | <i>Magnusiomyces clavatus</i>     | 2014 | 2019 | 5         |          |            |   |          | 1         |           |          | 1        | 2         | 1        |            |           |          |          |          |           | 10         |                |
| <i>Saprochaete clavata</i>                               | <i>Magnusiomyces clavatus</i>     | 2016 | 2019 | 6         |          |            |   |          |           | 4         |          |          | 2         | 1        |            |           |          |          | 3        |           | 16         |                |
| <b>Saccharomyces spp.</b>                                |                                   |      |      | <b>93</b> | <b>2</b> | <b>2</b>   |   | <b>4</b> | <b>44</b> | <b>26</b> | <b>2</b> | <b>5</b> | <b>52</b> | <b>7</b> | <b>19</b>  | <b>55</b> | <b>2</b> |          | <b>7</b> | <b>1</b>  | <b>321</b> |                |
| <i>Saccharomyces kluyveri</i>                            | <i>Lachancea kluyveri</i>         | 1998 | 2016 | 2         | 1        |            |   |          |           | 1         |          |          | 1         | 1        | 1          |           |          |          |          |           | 7          |                |
| <i>Saccharomyces cerevisiae</i>                          |                                   |      |      | 1970      | 2020     | 76<br>(91) | 1 | 2        |           | 4         | 43       | 25       | 2         | 5        | 50<br>(51) | 6         | 18       | 55       | 2        |           | 7          | 1<br>(31<br>3) |
| <i>Saccharomyces boulardii</i>                           | <i>Saccharomyces cerevisiae</i>   | 1991 | 2012 | 14        |          |            |   |          |           |           |          |          | 1         |          |            |           |          |          |          |           | 15         |                |
| <i>Saccharomyces cerevisiae</i> var.<br><i>boulardii</i> | <i>Saccharomyces cerevisiae</i>   | 2020 | 2020 | 1         |          |            |   |          |           |           |          |          |           |          |            |           |          |          |          |           | 1          |                |
| <i>Saccharomycopsis capsularis</i>                       |                                   | 2003 | 2003 |           |          |            |   |          |           | 1         |          |          |           |          |            |           |          |          |          |           | 1          |                |
| <b>Others</b>                                            |                                   |      |      | <b>21</b> |          | <b>1</b>   |   |          | <b>3</b>  | <b>8</b>  | <b>1</b> | <b>1</b> | <b>7</b>  |          | <b>1</b>   | <b>1</b>  |          | <b>5</b> |          | <b>49</b> |            |                |
| <i>Arxula adeninivorans</i>                              | <i>Blastobotrys adeninivorans</i> | 2015 | 2015 | 1         |          |            |   |          |           | 1         |          |          |           |          |            |           |          |          |          |           | 2          |                |
| <i>Blastobotrys proliferans</i>                          |                                   | 2007 | 2007 |           |          |            |   |          |           |           |          |          | 1         |          |            |           |          |          |          |           | 1          |                |
| <i>Debaryomyces nepalensis</i>                           |                                   | 2019 | 2019 | 1         |          |            |   |          |           | 1         |          |          |           |          |            |           |          |          |          |           | 2          |                |
| <i>Diutina neorugosa</i>                                 |                                   | 2019 | 2019 |           |          |            |   |          |           |           |          |          |           |          |            |           |          |          | 1        |           | 1          |                |
| (Ogatea polymorpha)                                      |                                   | NA   | NA   | (2)       |          |            |   |          |           | (2)       |          |          |           |          |            |           |          |          |          |           | (4)        |                |
| <i>Hansenela polymorpha</i>                              | <i>Ogataea polymorpha</i>         | 1980 | 1980 | 1         |          |            |   |          |           | 1         |          |          |           |          |            |           |          |          |          |           | 2          |                |
| <i>Hansenula polymorpha</i>                              | <i>Ogataea polymorpha</i>         | 1980 | 1980 | 1         |          |            |   |          |           | 1         |          |          |           |          |            |           |          |          |          |           | 2          |                |
| <i>Hanseniaspora opuntiae</i>                            |                                   | 2018 | 2018 | 1         |          |            |   |          |           |           |          |          |           |          |            |           |          |          |          |           | 1          |                |
| <i>Hanseniaspora uvarum</i>                              |                                   | 1998 | 2015 |           |          |            |   |          |           |           |          |          | 1(2)      |          |            |           |          |          | 2(3)     |           | 3(5)       |                |
| <i>Kloeckera apiculata</i>                               | <i>Hanseniaspora uvarum</i>       | 1998 | 1998 |           |          |            |   |          |           |           |          |          | 1         |          |            |           |          |          | 1        |           | 2          |                |
| <i>Hanseniaspora valbyensis</i>                          |                                   | 1960 | 1960 |           |          |            |   |          |           |           |          |          | 1         |          |            |           |          |          | 1        |           | 2          |                |
| <i>Issatchenkia occidentalis</i>                         |                                   | 2006 | 2006 |           |          |            |   |          |           | 1         |          |          |           |          |            |           |          |          |          |           | 1          |                |
| <i>Pichia terricola</i>                                  | <i>Issatchenkia terricola</i>     | 2019 | 2019 |           |          |            |   |          |           |           |          |          |           |          | 1          |           |          |          |          |           | 1          |                |

[illegible]

CNS: Central nervous system; ORL: oto-rhino-laryngology; NA: Not applicable; (n): number of publications corresponding to all isolates from the same species on the basis of their current taxonomic; (*species name*): yeast not found under this name corresponds to the current taxonomy, according to our algorithm.

**Table S2.** Number of publications found by anatomical site and species for the Basidiomycota yeasts division. In the same publication (PMID) several anatomical sites of isolation could be found.

| Name                             | Current name                           | Year of first publication | Year of last publication | Systemic | CNS | Eye | Ear | Dental and gums | ORL system | Lung | Breast | Heart | Gut | Liver | Urinary tract | Genitalia | Osteo-articular | Skeletal muscles | Soft tissue | Skin | Endocrine glands | Placenta | Total |
|----------------------------------|----------------------------------------|---------------------------|--------------------------|----------|-----|-----|-----|-----------------|------------|------|--------|-------|-----|-------|---------------|-----------|-----------------|------------------|-------------|------|------------------|----------|-------|
| <b><i>Cryptococcus</i> spp.</b>  |                                        |                           |                          | 37       | 18  | 9   | 1   |                 | 7          | 18   |        |       | 8   |       | 3             | 3         | 2               |                  |             | 23   |                  |          | 129   |
| <i>Cryptococcus adeliensis</i>   | <i>Naganishia adeliensis</i>           | 2004                      | 2005                     |          | 1   |     |     |                 | 1          | 1    |        |       |     |       |               |           |                 |                  |             |      |                  |          | 3     |
| <i>Cryptococcus arboriformis</i> | <i>Cutaneotrichosporon arboriforme</i> | 2007                      | 2015                     | 1        |     |     |     |                 |            |      |        |       | 1   |       | 1             |           |                 |                  |             |      |                  |          | 3     |
| <i>Cryptococcus chernovii</i>    | <i>Filobasidium chernovii</i>          | 2011                      | 2011                     |          |     |     |     |                 | 1          |      |        |       |     |       |               |           |                 |                  |             |      |                  |          | 1     |
| <i>Cryptococcus curvatus</i>     | <i>Cutaneotrichosporon curvatus</i>    | 1995                      | 2019                     | 1        | 3   | 1   |     |                 |            |      |        |       |     |       |               | 1         |                 |                  |             |      |                  |          | 6     |
| <i>Cryptococcus flavescens</i>   | <i>Papiliotrema flavescens</i>         | 2004                      | 2004                     |          | 1   |     |     |                 |            |      |        |       |     |       |               |           |                 |                  |             |      |                  |          | 1     |
| <i>Cryptococcus glabratus</i>    | <i>Nakaseomyces glabratus</i>          | 1950                      | 1950                     |          |     |     |     |                 |            |      |        |       |     |       |               | 1         |                 |                  |             |      |                  |          | 1     |
| <i>Cryptococcus humicola</i>     | <i>Vanrija humicola</i>                | 2001                      | 2010                     | 1        |     |     |     |                 | 1          | 2    |        |       |     |       |               |           |                 |                  |             | 2    |                  |          | 6     |
| <i>Cryptococcus liquefaciens</i> | <i>Naganishia liquefaciens</i>         | 2014                      | 2015                     | 1        | 1   |     |     |                 |            |      |        |       |     |       |               |           |                 |                  |             |      |                  |          | 2     |
| <i>Cryptococcus luteolus</i>     | <i>Hannaella luteola</i>               | 1955                      | 2014                     |          |     |     |     |                 |            | 1    |        |       |     |       |               |           | 1               |                  |             |      |                  |          | 2     |
| <i>Cryptococcus macerans</i>     | <i>Cystofilobasidium macerans</i>      | 1997                      | 1997                     |          | 1   |     |     |                 |            |      |        |       |     |       |               |           |                 |                  |             |      |                  |          | 1     |
| <i>Cryptococcus magnus</i>       | <i>Filobasidium magnum</i>             | 2011                      | 2011                     |          |     |     |     |                 | 1          |      |        |       |     |       |               |           |                 |                  |             |      |                  |          | 1     |
| <i>Cryptococcus terreus</i>      | <i>Solicoccozyma terreus</i>           | 1994                      | 1994                     | 1        |     |     |     |                 |            |      |        |       |     |       |               |           |                 |                  |             |      |                  |          | 1     |
| <i>Naganishia albida</i>         |                                        | 2017                      | 2020                     | 1        | (3) | (5) | 1   |                 | (2)        | (7)  |        |       | (2) |       | (1)           | (1)       | (1)             |                  |             | 1    |                  |          | 3     |



|                                 |                               |      |      |           |           |           |           |           |          |          |          |           |          |          |           |                 |               |                  |
|---------------------------------|-------------------------------|------|------|-----------|-----------|-----------|-----------|-----------|----------|----------|----------|-----------|----------|----------|-----------|-----------------|---------------|------------------|
|                                 |                               |      |      | (13<br>)  |           |           |           |           |          |          |          |           |          |          | (12<br>)  | (48<br>)        |               |                  |
| <i>Cryptococcus albidus</i>     | <i>Naganishia albida</i>      | 1972 | 2020 | 12        | 3         | 5         |           | 2         | 7        |          | 2        |           | 1        | 1        | 1         | 11              | 45            |                  |
|                                 |                               |      |      | 1         |           |           |           |           |          |          |          |           |          |          |           |                 | 1             |                  |
| <i>Papiliotrema laurentii</i>   |                               | 2019 | 2019 | (19<br>)  | (8)       | (3)       |           | (1)       | (7)      |          | (5)      |           | (1)      |          |           | (9)             | (53<br>)      |                  |
| <i>Cryptococcus laurentii</i>   | <i>Papiliotrema laurentii</i> | 1976 | 2020 | 18        | 8         | 3         |           | 1         | 7        |          | 5        |           | 1        |          |           | 9               | 52            |                  |
| <b>Malassezia spp.</b>          |                               |      |      | <b>70</b> | <b>3</b>  | <b>13</b> | <b>11</b> | <b>13</b> | <b>6</b> | <b>2</b> | <b>2</b> | <b>13</b> | <b>1</b> | <b>9</b> | <b>13</b> | <b>316</b>      | <b>1</b>      | <b>473</b>       |
| <i>Malassezia arunalokei</i>    |                               | 2016 | 2016 |           |           |           |           |           |          |          |          |           |          |          |           | 1               | 1             |                  |
| <i>Malassezia dermatis</i>      |                               | 2002 | 2018 |           |           |           |           |           |          |          |          |           |          |          |           | 6               | 6             |                  |
| <i>Malassezia furfur</i>        |                               | 1968 | 2020 | 51        | 2         | 4(9<br>)  | 2(5<br>)  | 4         | 5        | (1)      | 2        | 5         | 1        | 6(7<br>) | 4(5<br>)  | 89<br>(16<br>1) | 1             | 176<br>(25<br>9) |
| <i>Pityrosporum orbiculare</i>  | <i>Malassezia furfur</i>      | 1963 | 2005 |           |           | 3         | 1         |           |          | 1        |          |           |          | 1        | 1         | 27              | 34            |                  |
| <i>Pityrosporum ovale</i>       | <i>Malassezia furfur</i>      | 1947 | 2008 |           |           | 2         | 2         |           |          |          |          |           |          |          |           | 45              | 49            |                  |
| <i>Malassezia globosa</i>       |                               | 2000 | 2020 |           |           |           |           | 1         |          | 1        |          |           |          |          | 3         | 47              | 52            |                  |
| <i>Malassezia japonica</i>      |                               | 2003 | 2015 |           |           |           |           |           |          |          |          |           |          |          |           | 3               | 3             |                  |
| <i>Malassezia obtusa</i>        |                               | 2005 | 2016 |           |           |           |           |           |          |          |          |           |          |          | 1         | 7               | 8             |                  |
| <i>Malassezia pachydermatis</i> |                               | 1987 | 2020 | 16        | 1         | 2         | 2         | 3         | 1        |          | 2        |           | 2        | 1        |           | 18              | 48            |                  |
| <i>Malassezia restricta</i>     |                               | 2002 | 2020 |           |           | 1         | 1         | 4         |          |          | 6        |           |          |          |           | 32              | 44            |                  |
| <i>Malassezia slooffiae</i>     |                               | 2005 | 2017 |           |           |           | 2         |           |          |          |          |           |          | 2        |           | 10              | 14            |                  |
| <i>Malassezia sympodialis</i>   |                               | 1998 | 2020 | 3         |           | 1         | 1         | 1         |          |          |          |           |          | 1        |           | 31              | 38            |                  |
| <b>Rhodotorula spp.</b>         |                               |      |      | <b>64</b> | <b>12</b> | <b>8</b>  |           | <b>7</b>  | <b>5</b> |          | <b>4</b> | <b>12</b> | <b>1</b> | <b>1</b> | <b>4</b>  | <b>4</b>        | <b>18</b>     | <b>140</b>       |
| <i>Cystobasidium minutum</i>    |                               | 2020 | 2020 | 2(5<br>)  |           | (1)       |           |           |          |          |          |           |          | (1)      | (2)       | (1)             | 2<br>(10<br>) |                  |
| <i>Rhodotorula minuta</i>       | <i>Cystobasidium minutum</i>  | 1991 | 2020 | 3         |           | 1         |           |           |          |          |          |           | 1        |          | 2         | 1               | 8             |                  |

[illegible]

|                                          |                                          |      |      |            |           |           |           |           |            |          |           |           |           |           |           |           |          |           |            |           |            |          |
|------------------------------------------|------------------------------------------|------|------|------------|-----------|-----------|-----------|-----------|------------|----------|-----------|-----------|-----------|-----------|-----------|-----------|----------|-----------|------------|-----------|------------|----------|
| <i>Trichosporon jirovecii</i>            | <i>Cutaneotrichosporon jirovecii</i>     | 2012 | 2019 |            |           |           |           |           |            |          | 1         |           | 1         |           |           |           |          |           | 2          |           |            |          |
| <i>Trichosporon loubieri</i>             | <i>Apiotrichum loubieri</i>              | 2003 | 2019 | 3          |           |           |           | 1         |            |          | 1         | 1         | 2         |           |           |           | 2        |           | 10         |           |            |          |
| <i>Trichosporon montevidense</i>         | <i>Apiotrichum montevidense</i>          | 2019 | 2020 |            |           |           |           |           |            |          | 1         | 1         |           |           |           |           | 1        |           | 3          |           |            |          |
| <i>Trichosporon mucoides</i>             | <i>Cutaneotrichosporon mucoides</i>      | 1996 | 2019 | 8          | 1         |           |           | 3         | 2          |          | 1         |           |           |           |           |           | 8        |           | 23         |           |            |          |
| <i>Trichosporon mycotoxinivorous</i>     | <i>Apiotrichum mycotoxinivorous</i>      | 2009 | 2020 | 3          |           |           |           | 1         | 9          |          | 1         | 1         |           |           |           |           | 1        |           | 16         |           |            |          |
| <i>Trichosporon ovoides</i>              |                                          | 2008 | 2019 | 1          |           |           |           |           |            |          |           |           | 1         |           |           |           | 4        |           | 6          |           |            |          |
| <i>Trichosporon pullulans</i>            | <i>Guehomyces pullulans</i>              | 1988 | 2006 | 5          |           |           |           |           | 4          |          |           |           |           |           |           |           |          |           | 9          |           |            |          |
| <b>Others</b>                            |                                          |      |      | <b>9</b>   | <b>3</b>  | <b>1</b>  |           | <b>5</b>  |            |          | <b>1</b>  |           |           |           |           | <b>4</b>  |          | <b>23</b> |            |           |            |          |
| <i>Apiotrichum veenhuisii</i>            |                                          | 2019 | 2019 |            |           |           |           |           |            |          |           |           |           |           |           |           | 1        |           | 1          |           |            |          |
| <i>Fereydounia khargensis</i>            |                                          | 2016 | 2016 | 1          |           |           |           |           | 1          |          |           |           |           |           |           |           |          |           | 2          |           |            |          |
| <i>Pseudozyma alboarmeniaca</i>          |                                          | 2014 | 2014 | 1          |           |           |           |           |            |          |           |           |           |           |           |           |          |           | 1          |           |            |          |
| <i>Pseudozyma aphidis</i>                | <i>Moesziomyces aphidis</i>              | 2008 | 2016 | 4          |           |           |           |           | 2          |          |           |           |           |           |           |           | 1        |           | 7          |           |            |          |
| <i>Pseudozyma siamensis</i>              | <i>Ustilago siamensis</i>                | 2014 | 2014 | 1          |           |           |           |           |            |          |           |           |           |           |           |           |          |           | 1          |           |            |          |
| <i>Sporobolomyces holsaticus</i>         | <i>Sporobolomyces johnsonii</i>          | 1984 | 1984 |            |           |           |           |           |            |          |           |           |           |           |           |           | 1        |           | 1          |           |            |          |
| <i>Sporobolomyces roseus</i>             |                                          | 2012 | 2012 |            | 1         |           |           |           |            |          |           |           |           |           |           |           |          |           | 1          |           |            |          |
| <i>Sporobolomyces salm-<br/>onicolor</i> |                                          | 1976 | 2015 | 2          | 2         | 1         |           |           |            |          |           |           |           |           |           |           |          |           | 5          |           |            |          |
| <i>Sporidiobolus salmonicolor</i>        | <i>Sporobolomyces salm-<br/>onicolor</i> | 2015 | 2015 |            |           |           |           |           | 1          |          |           | (1)       |           |           |           |           |          |           | 1(2<br>)   |           |            |          |
| <i>Sterigmatomyces halophilus</i>        |                                          | 2019 | 2019 |            |           |           |           |           |            |          |           |           | 1         |           |           |           |          |           | 1          |           |            |          |
| <i>Wallemia sebi</i>                     | <i>Wallemia mellicola</i>                | 2008 | 2016 |            |           |           |           |           | 1          |          |           |           |           |           |           |           | 1        |           | 2          |           |            |          |
| <b>Total</b>                             |                                          |      |      | <b>398</b> | <b>64</b> | <b>39</b> | <b>19</b> | <b>65</b> | <b>126</b> | <b>3</b> | <b>39</b> | <b>96</b> | <b>37</b> | <b>97</b> | <b>30</b> | <b>18</b> | <b>1</b> | <b>5</b>  | <b>525</b> | <b>12</b> | <b>157</b> |          |
|                                          |                                          |      |      |            |           |           |           |           |            |          |           |           |           |           |           |           |          |           |            |           |            | <b>4</b> |

CNS: Central nervous system; ORL: oto-rhino-laryngology; (n): number of publications corresponding to all isolates from the same species on the basis of their current taxonomic
